# Supplementary material for: Is increased mortality by multiple exposures to COVID-19 an overseen factor when aiming for herd immunity?
Source: bioRxiv or medRxiv preprint supplement (doi:10.1101/2020.10.22.20217638), 2020-10-26
Supplement: Supplementary file [file media-2.pdf]

**S1 Table.** Population size and compartments.

| Parameter        | Description                                                                              | value       |
|------------------|------------------------------------------------------------------------------------------|-------------|
| $N$              | Population size                                                                          | 250,000,000 |
| $S(0)$           | No. susceptible                                                                          | 249,999,999 |
| $E_k(0)$         | No. single infected in $k$ th latent states ( $1 \leq k \leq n_E$ )                      | 0           |
| $E_k^*(0)$       | No. transient multi infections in latent states ( $1 \leq k \leq n_E$ )                  | 0           |
| $\tilde{E}_k(0)$ | No. multi infected in $k$ th latent states ( $1 \leq k \leq n_E$ )                       | 0           |
| $P_k(0)$         | No. single infected in $k$ th prodromal states ( $1 \leq k \leq n_P$ )                   | 0           |
| $P_k^*(0)$       | No. transient multi infections in prodromal states ( $1 \leq k \leq n_P$ )               | 0           |
| $\tilde{P}_k(0)$ | No. multi infected in prodromal states ( $1 \leq k \leq n_P$ )                           | 0           |
| $I_1(0)$         | No. single infected in first fully contagious Erlang state                               | 1           |
| $I_k(0)$         | No. single infected in $k$ th fully contagious states ( $2 \leq k \leq n_I$ )            | 0           |
| $I_k^*(0)$       | No. transient multi infections in $k$ th fully contagious states ( $1 \leq k \leq n_I$ ) | 0           |
| $\tilde{I}_k(0)$ | No. multi infected in full contagious states ( $1 \leq k \leq n_I$ )                     | 0           |
| $L_k(0)$         | No. single infected in $k$ th late-infectious states ( $1 \leq k \leq n_L$ )             | 0           |
| $L_k^*(0)$       | No. transient multi infections in $k$ th late-infectious states ( $1 \leq k \leq n_L$ )  | 0           |
| $\tilde{L}_k(0)$ | No. multi infected in $k$ th late-infectious states ( $1 \leq k \leq n_L$ )              | 0           |
| $R$              | No. recovered                                                                            | 0           |
| $D$              | No. dead                                                                                 | 0           |

Population size and compartments and their respective parameter choices.
