# Supplementary material for: Is increased mortality by multiple exposures to COVID-19 an overseen factor when aiming for herd immunity?
Source: medRxiv preprint, doi:10.1101/2020.10.22.20217638, version 1 (2020-10-26)
Supplement: Table S2 [file 217638_file12.pdf]

**S2 Table.** Summary of model parameters.

| Parameter                 | Definition                                                                  | Value     |
|---------------------------|-----------------------------------------------------------------------------|-----------|
| $n_E$                     | No. of latency Erlang states                                                | 16        |
| $n_P$                     | No. of prodromal Erlang states                                              | 16        |
| $n_I$                     | No. of fully contagious Erlang states                                       | 16        |
| $n_L$                     | No. of late-infectious Erlang states                                        | 16        |
| $D_E$                     | Average duration of latency period                                          | 3.7 days  |
| $D_P$                     | Average duration of prodromal period                                        | 1 day     |
| $D_I$                     | Average duration of fully contagious period                                 | 7 days    |
| $D_L$                     | Average duration of late infectious period                                  | 7 days    |
| $\varepsilon$             | Transition rate of latent states                                            | $n_E/D_E$ |
| $\varphi$                 | Transition rate of prodromal states                                         | $n_P/D_P$ |
| $\gamma$                  | Transition rate of early infectious states                                  | $n_I/D_I$ |
| $\delta$                  | Transition rate of late-infectious states                                   | $n_L/D_L$ |
| $\alpha$                  | Transition rate from transient multi infections to multi-infected states    | 3.2/day   |
| $f_{\text{Sick}}$         | Fraction of symptomatic (sick) infections                                   | 58%       |
| $\tilde{f}_{\text{Sick}}$ | Fraction of sympt. multi infections in fully contagious & late inf. periods | 64.4%     |
| $f_{\text{Iso}}$          | Fraction of single-infected (sick) who are isolated (or home isolated)      | 0.5       |
| $\tilde{f}_{\text{Iso}}$  | Fraction of multi-infected (sick) who are isolated (or home isolated)       | 0.55      |
| $f_{\text{Dead}}$         | Fraction of single-infected (sick) who die from the disease                 | 3%        |
| $\tilde{f}_{\text{Dead}}$ | Fraction of multi-infected (sick) who die from the disease                  | 4%        |

Summary of parameters describing number of Erlang states, durations, transition rates, morbidity and mortality, and their default parameter choices.
